# Supplementary material for: Effect of ethnicity on HbA1c levels in individuals without diabetes: Systematic review and meta-analysis
Source: PubMed Central journal article supplement (PMC5305058; doi:10.1371/journal.pone.0171315), 2017-02-13
Supplement: pone.0171315.s001.pdf [file pone.0171315.s001.pdf]

## MOOSE Checklist

From: Stroup DF, Berlin JA, Morton SC, et al (2000) Meta-analysis of observational studies in epidemiology: A proposal for reporting. JAMA 283:2008–2012. doi:10.1001/jama.283.15.2008.

|                                                                                                                                            | Reported on page | Comments                                                                                                  |
|--------------------------------------------------------------------------------------------------------------------------------------------|------------------|-----------------------------------------------------------------------------------------------------------|
| <b>Reporting of background should include</b>                                                                                              |                  |                                                                                                           |
| Problem definition                                                                                                                         | 4;5              |                                                                                                           |
| Hypothesis statement                                                                                                                       | 5                |                                                                                                           |
| Description of study outcome(s)                                                                                                            | 5;6              |                                                                                                           |
| Type of exposure or intervention used                                                                                                      | 5                |                                                                                                           |
| Type of study designs used                                                                                                                 | 6                |                                                                                                           |
| Study population                                                                                                                           | 6                |                                                                                                           |
| <b>Reporting of search strategy should include</b>                                                                                         |                  |                                                                                                           |
| Qualifications of searchers (e.g. librarians and investigators)                                                                            | 7                |                                                                                                           |
| Search strategy, including time period used in the synthesis and key words                                                                 | 5;6              | S1 Appendix (Supplemental Data)                                                                           |
| Effort to include all available studies, including contact with authors                                                                    | 5;6              |                                                                                                           |
| Databases and registries searched                                                                                                          | 5                |                                                                                                           |
| Search software used, name and version, including special features used (e.g. explosion)                                                   | 5                |                                                                                                           |
| Use of hand searching (e.g. reference lists of obtained articles)                                                                          | 5                |                                                                                                           |
| List of citations located and those excluded, including justification                                                                      | 8, 9             | Also Figure 1, Table 1                                                                                    |
| Method of addressing articles published in languages other than English                                                                    | 5                | No papers in languages other than English were eligible for inclusion in the steps of full text analysis. |
| Method of handling abstracts and unpublished studies                                                                                       | 7                |                                                                                                           |
| Description of any contact with authors                                                                                                    | 6 and 7          |                                                                                                           |
| <b>Reporting of methods should include</b>                                                                                                 |                  |                                                                                                           |
| Description of relevance or appropriateness of studies assembled for assessing the hypothesis to be tested                                 | 6                |                                                                                                           |
| Rationale for the selection and coding of data (e.g. sound clinical principles or convenience)                                             | 6 and 7          |                                                                                                           |
| Documentation of how data were classified and coded (e.g. multiple raters, blinding and interrater reliability)                            | 7                |                                                                                                           |
| Assessment of confounding (e.g. comparability of cases and controls in studies where appropriate)                                          | 8                |                                                                                                           |
| Assessment of study quality, including blinding of quality assessors, stratification or regression on possible predictors of study results | 7 and 8          |                                                                                                           |
| Assessment of heterogeneity                                                                                                                | 8                |                                                                                                           |
| Description of statistical methods (e.g. complete description                                                                              | 8                |                                                                                                           |

|                                                                                                                                                                                                                 |                 |                                                                                                           |
|-----------------------------------------------------------------------------------------------------------------------------------------------------------------------------------------------------------------|-----------------|-----------------------------------------------------------------------------------------------------------|
| of fixed or random effects models, justification of whether the chosen models account for predictors of study results, dose-response models, or cumulative meta-analysis) in sufficient detail to be replicated |                 |                                                                                                           |
| Provision of appropriate tables and graphics                                                                                                                                                                    | 10-13, 15,30;31 | Tables 1 and 2; Figures 1 and 2                                                                           |
| <b>Reporting of results should include</b>                                                                                                                                                                      |                 |                                                                                                           |
| Graphic summarizing individual study estimates and overall estimate                                                                                                                                             | 31              | Figure 2                                                                                                  |
| Table giving descriptive information for each study included                                                                                                                                                    | 10-13           | Table 1                                                                                                   |
| Results of sensitivity testing (e.g. subgroup analysis)                                                                                                                                                         | 16,17           |                                                                                                           |
| Indication of statistical uncertainty of findings                                                                                                                                                               | 16,17,31        | Figure 2                                                                                                  |
| <b>Reporting of discussion should include</b>                                                                                                                                                                   |                 |                                                                                                           |
| Quantitative assessment of bias (e.g. publication bias)                                                                                                                                                         | 17,18           |                                                                                                           |
| Justification for exclusion (e.g. exclusion of non-English language citations)                                                                                                                                  | 17,18,19        | No papers in languages other than English were eligible for inclusion in the steps of full text analysis. |
| Assessment of quality of included studies                                                                                                                                                                       | 15              | Table 2                                                                                                   |
| <b>Reporting of conclusions should include</b>                                                                                                                                                                  |                 |                                                                                                           |
| Consideration of alternative explanations for observed results                                                                                                                                                  | 18,19           |                                                                                                           |
| Generalization of the conclusions (i.e. appropriate for the data presented and within the domain of the literature review)                                                                                      | 19,20           |                                                                                                           |
| Guidelines for future research                                                                                                                                                                                  | 20              |                                                                                                           |
| Disclosure of funding source                                                                                                                                                                                    | 21              |                                                                                                           |
