# Supplementary material for: Effect of ethnicity on HbA1c levels in individuals without diabetes: Systematic review and meta-analysis
Source: PubMed Central journal article supplement (PMC5305058; doi:10.1371/journal.pone.0171315), 2017-02-13
Supplement: pone.0171315.s003.pdf [file pone.0171315.s003.pdf]

## **Appendix (Supplementary Data):**

The complete search strategy for MEDLINE.

```
(((((((((Hemoglobins[Title/Abstract]) OR Hemoglobin A, Glycosylated[Title/Abstract])  
OR Hb A1c[Title/Abstract]) OR Glycosylated Hemoglobin A[Title/Abstract]) OR  
Hemoglobin, Glycosylated[Title/Abstract]) OR Glycosylated Hemoglobin[Title/Abstract])  
OR Glycated Hemoglobins[Title/Abstract]) OR Hemoglobins, Glycated[Title/Abstract]))  
AND (((((Ethnic Groups[Title/Abstract]) OR African Continental Ancestry  
Group[Title/Abstract]) OR Oceanic Ancestry Group[Title/Abstract]) OR European  
Continental Ancestry Group[Title/Abstract]) OR Asian Continental Ancestry  
Group[Title/Abstract])
```

The complete search strategy for EMBASE.

```
'hemoglobin'/exp AND a1c AND [embase]/lim OR glycosylated AND 'hemoglobin'/exp  
AND [embase]/lim AND 'ethnicity'/exp AND [embase]/lim OR ethnic AND racial AND  
groups AND [embase]/lim OR ethnic AND group AND [embase]/lim OR ethnic, AND  
racial AND religious AND groups AND [embase]/lim
```
